# Supplementary material
Source: Springer Nature journal article supplement (https://www.springermedizin.de/resource/supplementary/12895_2011_126_MOESM3_ESM.pdf/9514192)
Supplement: MOESM3 [file 9514192]

## HAE-BOIS-Europe

```
graph TD; A[HAE-BOIS-Europe] --> B[Patient questionnaire (web/paper based) to collect information on:]; A --> C[One-on-one interviews to collect:]; B --> B1[• Individuals health care resource use]; B --> B2[• Indirect medical costs]; B --> B3[• Impact on work and school]; B --> B4[• Treatment satisfaction]; B --> B5[• Emotional functioning]; C --> C1[• Detailed qualitative, descriptive data and patient testimonials on the impact of HAE on HRQL];
```

Patient questionnaire (web/paper based) to collect information on:

- Individuals health care resource use
- Indirect medical costs
- Impact on work and school
- Treatment satisfaction
- Emotional functioning

One-on-one interviews to collect:

- Detailed qualitative, descriptive data and patient testimonials on the impact of HAE on HRQL
